# Supplementary material for: Yttrium-doped CuSCN thin film transistor: synthesis and optoelectronic characterization study
Source: Royal Society of Chemistry journal article supplement (doi:10.1039/c9tc05371a), 2019-01-01
Supplement: c9tc05371a1.pdf [file c9tc05371a1.pdf]

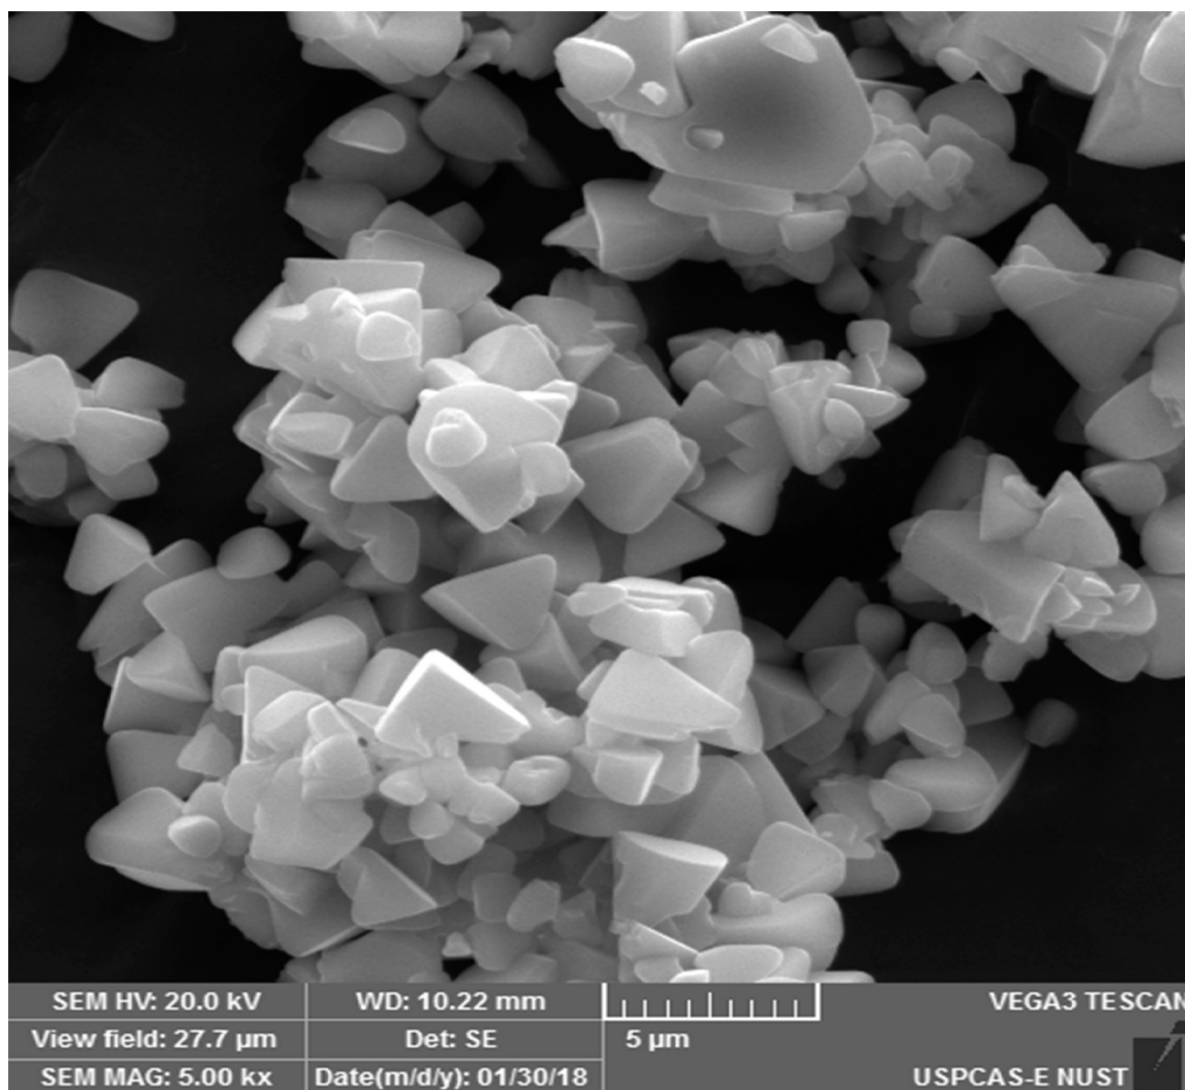

**Figure.S1.** SEM image of pure CuSCN powder synthesized using precipitation method, used for the preparation of spin coating solutions.

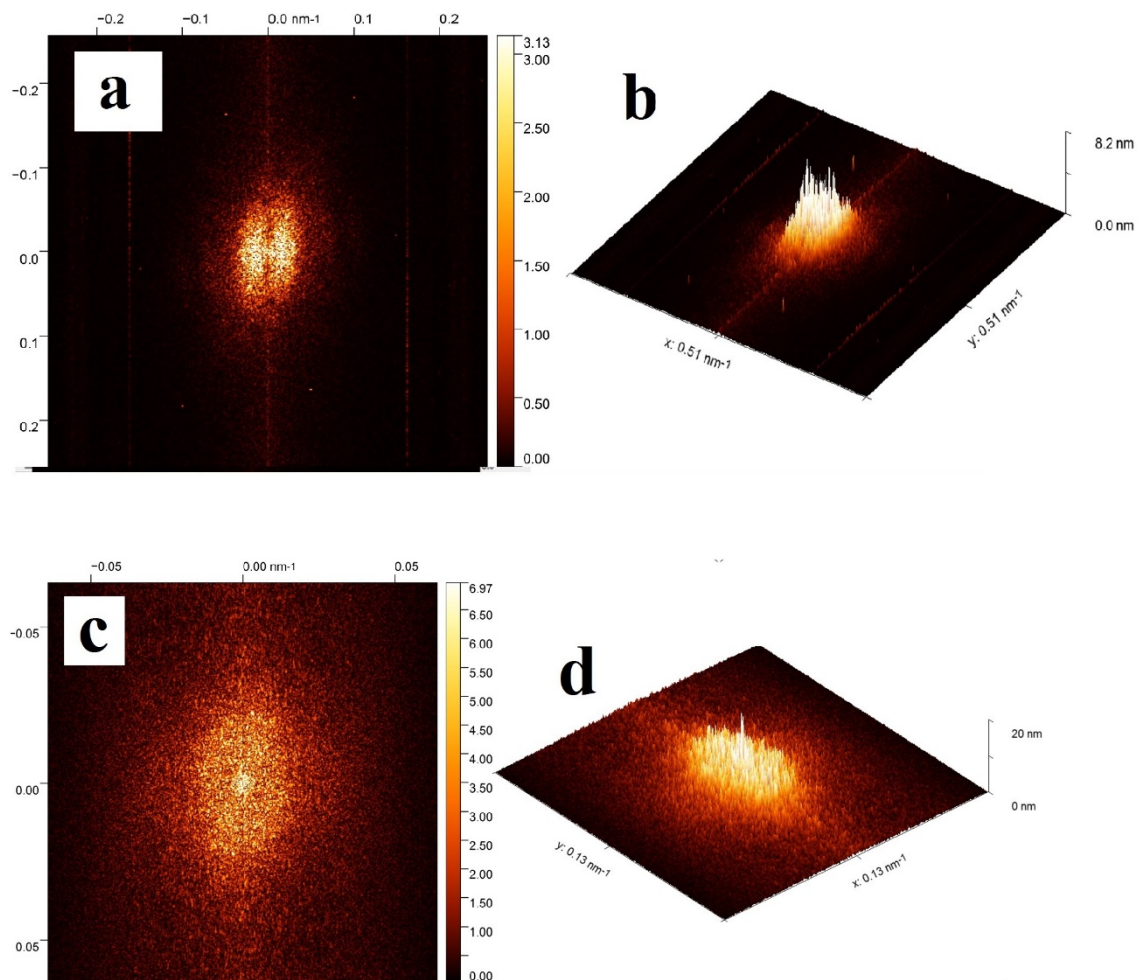

**Figure. S2.** (a) 2D-FFT modulus and (b) 3D-FFT modulus for pure CuSCN, (c) 2D-FFT modulus and (c) 3D-FFT modulus for 1% Y(III)-CuSCN describing the height distribution of particles over silicon substrates

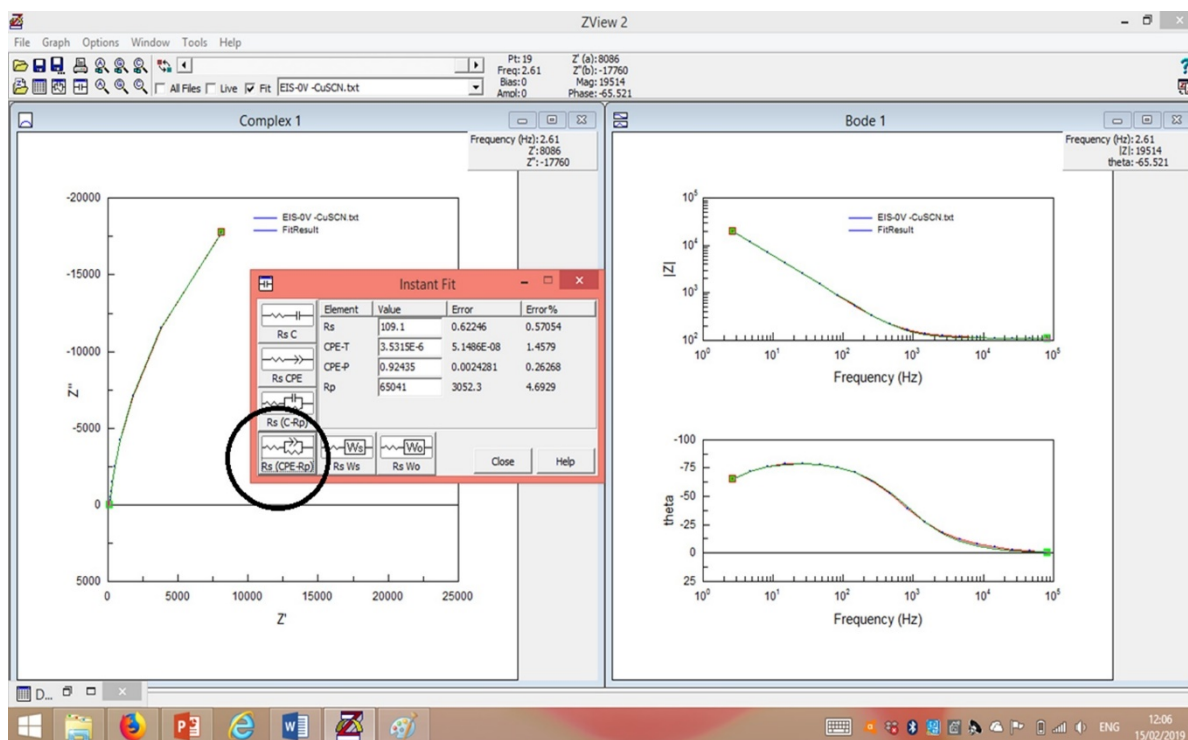

**Figure.S3.** Data (a) Nyquist plot, (b) and (c) bode plots are overlaid with simulated data of encircled Randles circuit and data (d) for pure CuSCN film.

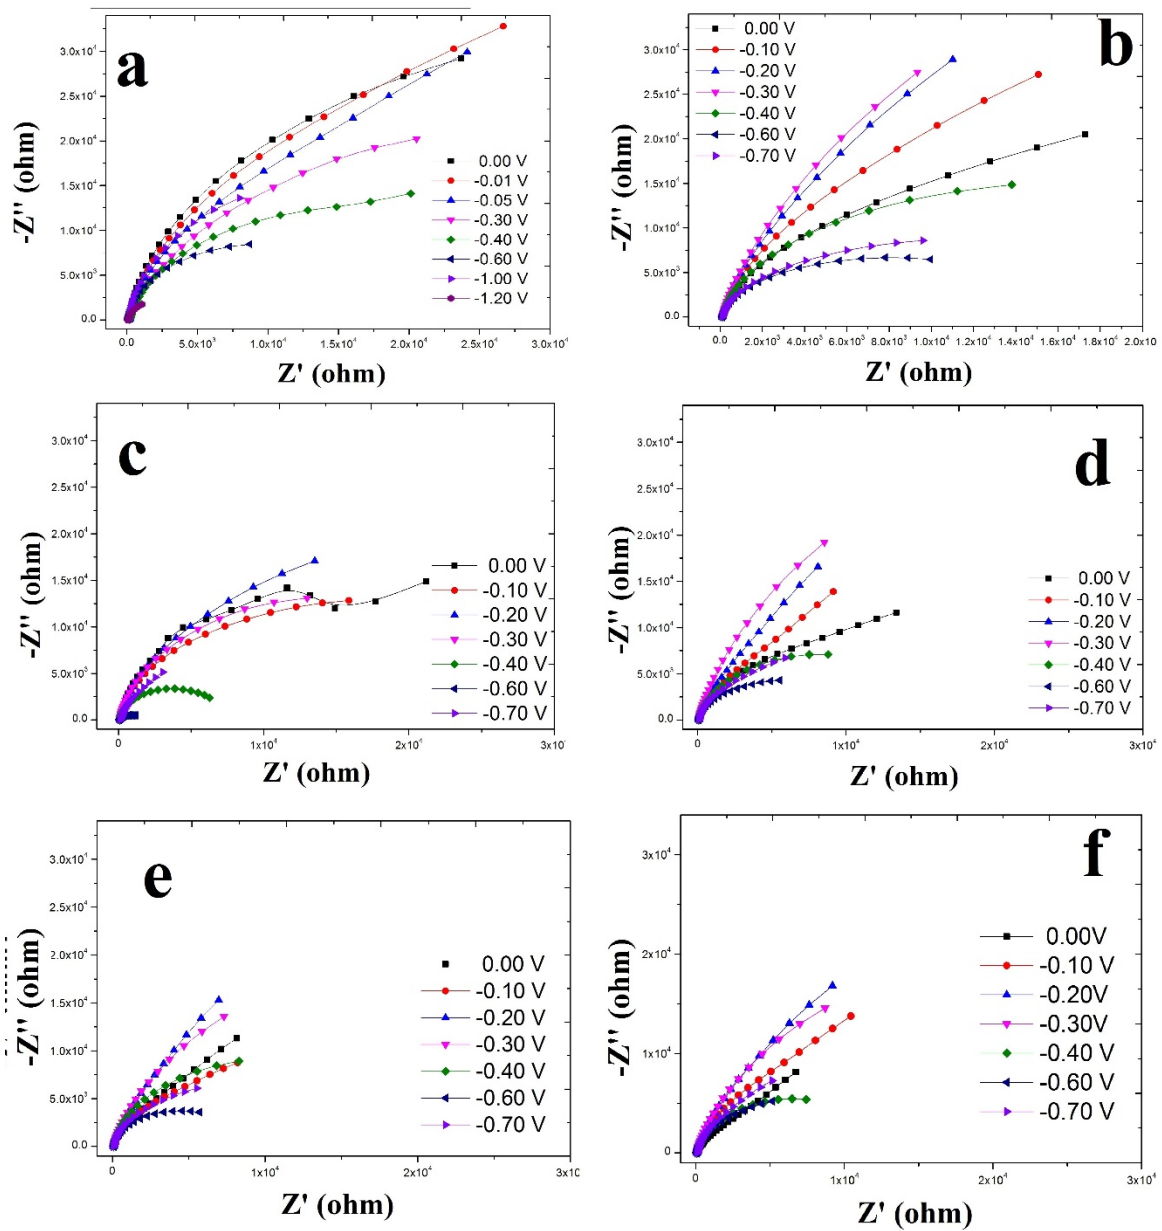

**Figure.S4.** Plots showing effect of applied bias on impedance of (a) pure CuSCN and, (b) 0.05 %, (c) 0.10 %, (d) 0.50 %, (e) 1.00 % and (f) 2.00 % yttrium doped CuSCN.
